# Supplementary material for: Single cell transcriptomics identifies a unique adipose lineage cell population that regulates bone marrow environment
Source: eLife. 2020 Apr 14;9:e54695. doi: 10.7554/eLife.54695 (PMC7220380; doi:10.7554/eLife.54695)
Supplement: Figure 3—source data 1. [file elife-54695-fig3-data1.xlsx]

## Sheet: Sheet1
	1M	3M	16M
MSC	237	96	274
late MSC	831	235	0
MBP	750	265	314
OB	780	312	477
Ocy	104	31	63
LCP	828	257	1015
AD	1570	430	4923
	1M	3M	16M
MP	1818	596	588
AD	1570	430	4923
all BM	5100	1626	7066
	1M	3M	16M
progenitor	0.356471	0.366544	0.0832154
AD	0.307843	0.264453	0.696717
