# Supplementary material for: Single cell transcriptomics identifies a unique adipose lineage cell population that regulates bone marrow environment
Source: eLife. 2020 Apr 14;9:e54695. doi: 10.7554/eLife.54695 (PMC7220380; doi:10.7554/eLife.54695)
Supplement: Figure 5—source data 1. [file elife-54695-fig5-data1.xlsx]

## Sheet: Sheet1
	Adipoq+
	M1	M2	M3	M4
Vegfa	2.74157	2.27363	5.87667	5.04551
Vegfc	326.288	310.834	142.025	256
Angpt4	33.5909	23.7524	16.8211	9.44794
Rspo3	198.088	212.306	232.325	256
Cebpa	5.13	3.68	8.75435	10.4831
Lpl	8.94	13.09	17.4459	13.3637
Adipoq	362.04	218.27	526.394	436.549
Pparg	190.68	167.15	66.487	63.338
Il1rn	4.11	3.48	1.85318	2.37554
Serpina3g	11.96	11.63	16.22	20.25
Agt	248.14	397.55	202.953	149.603
Gdpd2	384.01	358.29	316.267	236.386
Rankl	50.39	50.04	49.0099	57.4805
Cxcl12	373.51	348.5	289.015	176.681
Lepr	340.14	464.65	415.873	206.5
Esm1	213.04	186.75	202.953	175.46
Kng1	1098.3	696.8	215.8	576.7
Kng2	301.29	299.21	229.922	269.66
