# Supplementary material for: Single cell transcriptomics identifies a unique adipose lineage cell population that regulates bone marrow environment
Source: eLife. 2020 Apr 14;9:e54695. doi: 10.7554/eLife.54695 (PMC7220380; doi:10.7554/eLife.54695)
Supplement: Figure 6—source data 1. [file elife-54695-fig6-data1.xlsx]

## Sheet: Density
Veh					DT
Vessel number	Tissue area (um2)	Tissue area (mm2)	Vessel density (mm-2)	Average	Vessel number	Tissue area (mm2)	Vessel density (mm-2)		Average
12	44824.3	0.0448243	267.712		7	44824.3	0.0448243	156.165
9	44824.3	0.0448243	200.784		8	44824.3	0.0448243	178.475
10	44824.3	0.0448243	223.094		8	44824.3	0.0448243	178.475
7	44824.3	0.0448243	156.165		7	44824.3	0.0448243	156.165
7	44824.3	0.0448243	156.165	200.784	10	44824.3	0.0448243	223.094
9	44824.3	0.0448243	200.784		5	44824.3	0.0448243	111.547
8	44824.3	0.0448243	178.475		4	44824.3	0.0448243	89.2374	156.165
6	44824.3	0.0448243	133.856		6	44824.3	0.0448243	133.856
8	44824.3	0.0448243	178.475		5	44824.3	0.0448243	111.547
6	44824.3	0.0448243	133.856		4	44824.3	0.0448243	89.2374
9	44824.3	0.0448243	200.784	171.038	4	44824.3	0.0448243	89.2374
11	44824.3	0.0448243	245.403		4	44824.3	0.0448243	89.2374	102.623
9	44824.3	0.0448243	200.784		5	44824.3	0.0448243	111.547
7	44824.3	0.0448243	156.165		7	44824.3	0.0448243	156.165
10	44824.3	0.0448243	223.094		6	44824.3	0.0448243	133.856
7	44824.3	0.0448243	156.165		4	44824.3	0.0448243	89.2374
11	44824.3	0.0448243	245.403	204.502	2	44824.3	0.0448243	44.6187
					5	44824.3	0.0448243	111.547
					4	44824.3	0.0448243	89.2374
					5	44824.3	0.0448243	111.547	105.969
			Average of 3 mice	192.108				Average of 3 mice	121.586
			STD	10.5895				STD	17.3167
		mm-2	Veh	DT
		Average of 3 mice	192.108	121.586
		STD	10.5895	17.3167

## Sheet: Area
Vessel area
Veh			DT
um2	mm2	Average	um2	mm2	Average
3004.88	0.00300488		7744.1	0.0077441
2973.3	0.0029733	0.00298909	5644.97	0.00564497	0.00669454
4101.54	0.00410154		4853.27	0.00485327
3373.21	0.00337321	0.00373737	5848.33	0.00584833	0.0053508
3671.39	0.00367139		4191.76	0.00419176
2486.41	0.00248641		7295.34	0.00729534
989.636	0.000989636	0.00238248	4342.46	0.00434246	0.00527652
	Average of 3 mice	0.00303631		Average of 3 mice	0.00577395
	STD	0.000391836		STD	0.000460792
mm2	Veh	DT
average	0.00303631	0.00577395
SEM	0.000391836	0.000460792

## Sheet: Diameter
Vessel diameter (µm)
Veh	Average		DT	Average
7.73367			26.955
9.20067			25.6724
7.20267	8.47863		12.5971
9.7775			18.547
13.5206			20.2175	20.7978
13.1905			21.1781
13.1242			23.2483
15.277	13.7781		30.9698
10.567			27.602
9.19575			16.2243	23.8445
5.78333			26.6013
7.4715	8.2544		22.7103
			26.8958
			30.802
			21.5166	25.7052
Average of 3 mice	10.1704		Average of 3 mice	23.4492
STD	1.80501		STD	1.43036
µm	Veh	DT
average	10.1704	23.4492
SEM	1.80501	1.43036
