# Supplementary material for: Single cell transcriptomics identifies a unique adipose lineage cell population that regulates bone marrow environment
Source: eLife. 2020 Apr 14;9:e54695. doi: 10.7554/eLife.54695 (PMC7220380; doi:10.7554/eLife.54695)
Supplement: Figure 7—source data 1. [file elife-54695-fig7-data1.xlsx]

## Sheet: Sheet1
Group	VOX-BV/TV	DT-Tb.N	DT-Tb.Th	DT-Tb.Sp	Conn-Dens.	TRI-SMI
Veh	0	0	0	0	1.9618	0
Veh	0	0	0	0	0	0
Veh	0	0	0	0	2.4359	0
Veh	0	0	0	0	2.1299	0
Veh	0	0	0	0	0	0
DTR	0.0545	5.8341	0.0273	0.1675	282.37	2.3773
DTR	0.0473	5.9881	0.0274	0.1657	252.046	2.2468
DTR	0.0963	6.8382	0.0433	0.1401	222.191	3.0258
DTR	0.078	6.1944	0.0372	0.1575	189.383	2.7178
DTR	0.0436	7.6777	0.0362	0.1402	87.3534	3.1539
