# Supplementary material for: Single cell transcriptomics identifies a unique adipose lineage cell population that regulates bone marrow environment
Source: eLife. 2020 Apr 14;9:e54695. doi: 10.7554/eLife.54695 (PMC7220380; doi:10.7554/eLife.54695)
Supplement: Figure 7—source data 2. [file elife-54695-fig7-data2.xlsx]

## Sheet: Sheet1
S-DOB	ct th	Porosity ( 1- Vox-BV/TV) %	Cortical area =(Vox TV/ EI-Siz Z * Dim Z)	pMOI[mm^4]	Mean2	ES	PS
WT	0.129	0.0813	0.538488	0.25184	1116.09	3.95501	4.87729
WT	0.122	0.0763	0.657904	0.29466	1119.23	4.15509	5.2023
WT	0.1106	0.0802	0.535344	0.32729	1153.48	3.99263	4.9235
WT	0.1127	0.0548	0.515137	0.30979	1147.15	3.91741	4.83778
WT	0.1059	0.0875	0.515722	0.30232	1228.4	3.93868	4.93372
WT	0.1199	0.0788	0.609407	0.39177	1227.11	3.99695	4.82774
DTR	0.144	0.1162	0.660137	0.25497	1039.72	3.93377	4.99349
DTR	0.151	0.1198	0.698969	0.25091	1038.12	3.81849	4.94352
DTR	0.145	0.1244	0.658201	0.20485	1032.06	3.60154	4.83394
DTR	0.146	0.1063	0.740388	0.27746	1105.01	3.74658	4.84557
DTR	0.156	0.1179	0.724339	0.24941	1047.85	3.86873	4.81688
